# Supplementary figures and images for: Cumulative Incidence and Risk Factors for Anti-Resorptive Agent-Related Osteonecrosis of the Jaw during Long-Term Prostate Cancer Management
Source: Research Square preprint supplement (doi:10.21203/rs.3.rs-3997159/v1), 2024-03-19

Supplemental Figure 1 Study schematic

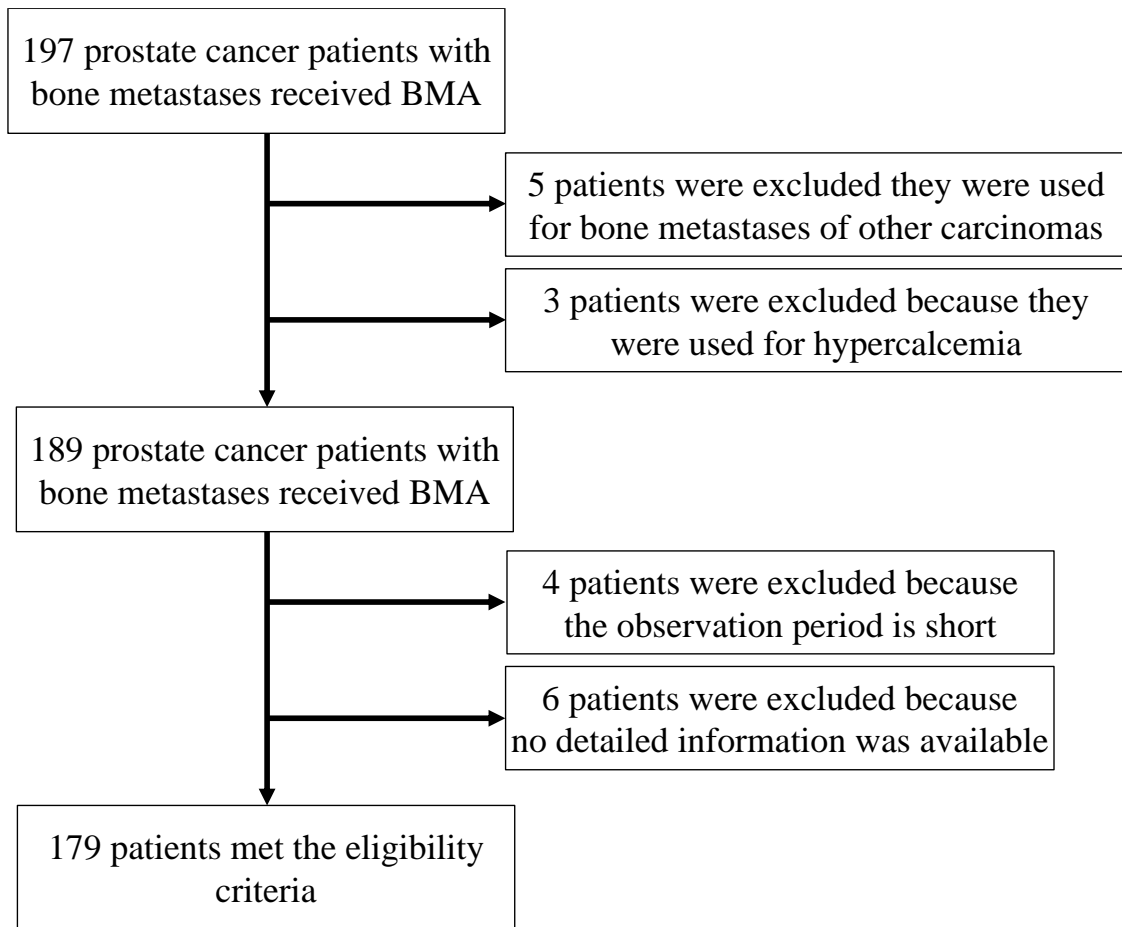

BMA: bone-modifying agents

Supplement: Supplementary file 1 [file 9cf3dc559c9cf8e9f0aad3b5.pdf]
